# Supplementary material
Source: publisher site journal article supplement (https://www.spandidos-publications.com/1890/downloadSupplementary)

Figure S1. Analysis of RPN2 expression and clinical parameters from the Chinese Glioma Genome Atlas dataset (Mseq-325). Specified parameters were analyzed based on (A) IDH gene mutation status, (B) 1p/19q codeletion status and (C) age. \*\* $P < 0.01$ , \*\*\*\* $P < 0.0001$ . RPN2, ribophorin II; IDH, isocitrate dehydrogenase.

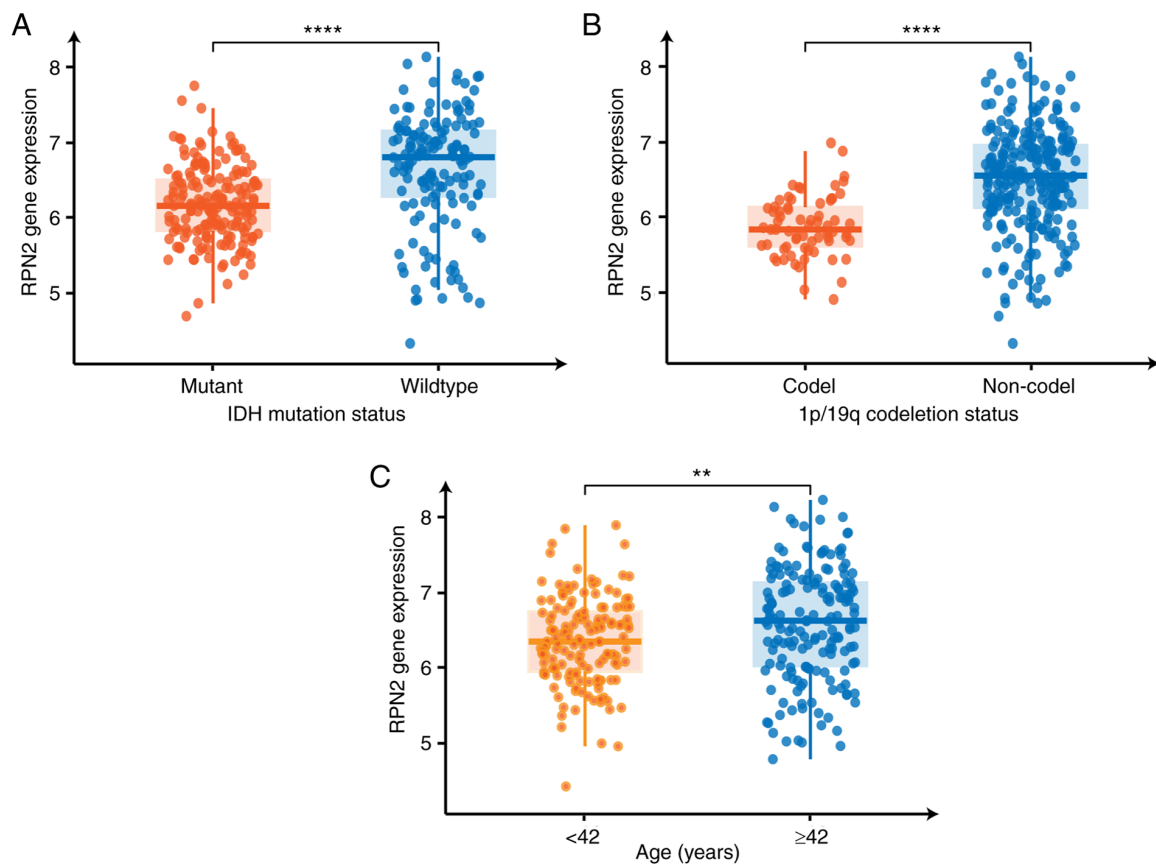

Supplement: Supplementary file 1 [file downloadSupplementary]
